# Supplementary material for: Watermelon Intake Is Associated with Increased Nutrient Intake and Higher Diet Quality in Adults and Children, NHANES 2003–2018
Source: MDPI journal article supplement (doi:10.3390/nu14224883), 2022-11-18
Supplement: s1 [file s1]

Supplementary Table S1. Watermelon intake grams per day per capita among children (2-18 years) and adults (19+ years), NHANES 2003-2018

| NHANES<br>Cycle | 2-18 y               |                    |                      | 19+ y             |                    |                      |
|-----------------|----------------------|--------------------|----------------------|-------------------|--------------------|----------------------|
|                 | All<br>(n=21,004)    | Male<br>(n=10,541) | Female<br>(n=10,463) | All<br>(n=35,126) | Male<br>(n=17,226) | Female<br>(n=17,900) |
| 2003-2018       | 7.51 (0.81)          | 8.27 (1.22)        | 6.72 (0.87)          | 7.29 (0.59)       | 6.96 (0.77)        | 7.61 (0.71)          |
| 2003-2004       | 4.34 (0.86)          | 3.90 (1.59)        | 4.81 (1.50)          | 7.07 (2.40)       | 7.70 (2.93)        | 6.47 (2.47)          |
| 2005-2006       | 6.32 (1.00)          | 4.97 (1.67)        | 7.75 (1.49)          | 4.44 (0.71)       | 4.18 (0.88)        | 4.69 (1.21)          |
| 2007-2008       | 7.57 (3.43)          | 6.43 (2.80)        | 8.71 (4.54)          | 6.22 (1.48)       | 7.73 (2.32)        | 4.89 (1.09)          |
| 2009-2010       | 7.45 (1.45)          | 7.87 (2.23)        | 7.04 (2.67)          | 8.01 (1.23)       | 6.67 (2.17)        | 9.28 (1.22)          |
| 2011-2012       | 8.78 (2.10)          | 11.1 (3.66)        | 6.34 (1.17)          | 5.73 (1.28)       | 5.17 (1.80)        | 6.27 (1.44)          |
| 2013-2014       | 7.40 (2.13)          | 10.1 (3.15)        | 4.60 (1.62)          | 8.31 (1.60)       | 6.88 (2.32)        | 9.67 (1.68)          |
| 2015-2016       | 7.88 (2.61)          | 10.2 (5.93)        | 5.73 (0.98)          | 9.36 (2.26)       | 6.23 (1.14)        | 12.4 (3.69)          |
| 2017-2018       | 10.2 (3.13)          | 11.6 (4.23)        | 8.71 (3.28)          | 8.77 (1.71)       | 10.8 (3.00)        | 6.80 (1.40)          |
|                 | <b>Beta (SE)</b>     | <b>Beta (SE)</b>   | <b>Beta (SE)</b>     | <b>Beta (SE)</b>  | <b>Beta (SE)</b>   | <b>Beta (SE)</b>     |
|                 | 0.59 (0.35)          | 1.12 (0.55)        | 0.04 (0.37)          | 0.49 (0.29)       | 0.35 (0.38)        | 0.62 (0.34)          |
| <b>Cycle</b>    | <b>P<sup>a</sup></b> | <b>P</b>           | <b>P</b>             | <b>P</b>          | <b>P</b>           | <b>P</b>             |
| <b>Trend</b>    | 0.0979               | <b>0.0427</b>      | 0.9138               | 0.0962            | 0.3532             | 0.0683               |

Data presented as mean (standard error). <sup>a</sup>p value for difference between NHANES 2003-2004 and 2017-2018 cycles. Bolded values are significantly different, p<0.05; SE = standard error.

Supplementary Table S2. Association of watermelon consumption with Healthy Eating Index-2015 total and sub-component scores in children, NHANES 2003-2018, gender combined data

| Healthy Eating Index 2015 Components <sup>a</sup> | Non-Consumer<br>(n=18,821) | Consumer<br>(n=513) | Beta (SE)    | P <sup>b</sup>    |
|---------------------------------------------------|----------------------------|---------------------|--------------|-------------------|
|                                                   | Mean (SE)                  | Mean (SE)           |              |                   |
| Component 1 – total vegetables                    | 2.15 (0.01)                | 2.14 (0.06)         | -0.01 (0.06) | 0.8883            |
| Component 2 - greens and beans                    | 0.87 (0.03)                | 1.01 (0.13)         | 0.14 (0.13)  | 0.2656            |
| Component 3 - total fruit                         | 2.46 (0.02)                | 4.18 (0.11)         | 1.71 (0.12)  | <b>&lt;0.0001</b> |
| Component 4 - whole fruit                         | 2.17 (0.02)                | 4.47 (0.09)         | 2.30 (0.09)  | <b>&lt;0.0001</b> |
| Component 5 - whole grains                        | 2.31 (0.05)                | 2.63 (0.18)         | 0.32 (0.18)  | 0.0863            |
| Component 6 - dairy                               | 6.89 (0.03)                | 6.83 (0.11)         | -0.06 (0.11) | 0.6092            |
| Component 7 - total protein foods                 | 3.56 (0.02)                | 3.70 (0.10)         | 0.14 (0.10)  | 0.1563            |
| Component 8 - seafood and plant protein           | 1.58 (0.03)                | 1.89 (0.17)         | 0.31 (0.17)  | 0.0699            |
| Component 9 - fatty acid ratio                    | 3.83 (0.04)                | 4.01 (0.24)         | 0.18 (0.24)  | 0.4640            |
| Component 10 - sodium                             | 4.96 (0.05)                | 5.14 (0.21)         | 0.17 (0.21)  | 0.4089            |
| Component 11 - refined grain                      | 5.18 (0.05)                | 4.99 (0.29)         | -0.19 (0.28) | 0.5163            |
| Component 12 - saturated fat                      | 5.42 (0.04)                | 5.78 (0.22)         | 0.35 (0.22)  | 0.1120            |
| Component 13 - added sugar                        | 5.68 (0.04)                | 6.39 (0.18)         | 0.71 (0.18)  | <b>0.0001</b>     |
| HEI-2015 total score                              | 47.07 (0.16)               | 53.17 (0.78)        | 6.10 (0.79)  | <b>&lt;0.0001</b> |

Data source: NHANES 2003-2018; subjects 2 to 18 years old with complete, reliable dietary recall on Day 1 (N=21,004). <sup>a</sup>Values are adjusted for age, gender, ethnicity (Mexican American, other Hispanic, White, Black, Other), poverty income ratio, physical activity level (sedentary, moderate, vigorous), total

vegetables, non-watermelon fruit, and total dairy. <sup>b</sup>p value for difference of intake between watermelon consumers and non-consumers; Bolded values are significantly different, p<0.05; SE = standard error.

Supplementary Table S3. Association of watermelon consumption with Healthy Eating Index-2015 total and sub-component score in adults, NHANES 2003-2018, gender combined data

| Healthy Eating Index 2015 Components <sup>a</sup> | Non-Consumer<br>(n=31,569) | Consumer<br>(n=792) | Beta (SE)    | P <sup>b</sup>    |
|---------------------------------------------------|----------------------------|---------------------|--------------|-------------------|
|                                                   | Mean (SE)                  | Mean (SE)           |              |                   |
| Component 1 – total vegetables                    | 3.08 (0.01)                | 3.12 (0.06)         | 0.05 (0.06)  | 0.4192            |
| Component 2 - greens and beans                    | 1.49 (0.02)                | 1.53 (0.12)         | 0.04 (0.12)  | 0.7403            |
| Component 3 - total fruit                         | 1.99 (0.01)                | 4.12 (0.09)         | 2.13 (0.09)  | <b>&lt;0.0001</b> |
| Component 4 - whole fruit                         | 1.98 (0.02)                | 4.36 (0.08)         | 2.38 (0.08)  | <b>&lt;0.0001</b> |
| Component 5 - whole grains                        | 2.40 (0.04)                | 2.40 (0.15)         | 0.004 (0.16) | 0.9788            |
| Component 6 - dairy                               | 5.08 (0.02)                | 5.12 (0.12)         | 0.03 (0.12)  | 0.7772            |
| Component 7 - total protein foods                 | 4.21 (0.01)                | 4.18 (0.05)         | -0.03 (0.05) | 0.5822            |
| Component 8 - seafood and plant protein           | 2.32 (0.02)                | 2.13 (0.14)         | -0.18 (0.14) | 0.1891            |
| Component 9 - fatty acid ratio                    | 4.96 (0.03)                | 5.13 (0.16)         | 0.17 (0.16)  | 0.2941            |
| Component 10 - sodium                             | 4.23 (0.03)                | 4.59 (0.19)         | 0.37 (0.19)  | 0.0541            |
| Component 11 - refined grain                      | 6.17 (0.03)                | 6.24 (0.18)         | 0.08 (0.19)  | 0.6948            |
| Component 12 - saturated fat                      | 5.87 (0.03)                | 6.49 (0.16)         | 0.62 (0.16)  | <b>0.0003</b>     |
| Component 13 - added sugar                        | 6.55 (0.04)                | 6.95 (0.17)         | 0.41 (0.17)  | <b>0.0187</b>     |
| HEI-2015 total score                              | 50.32 (0.14)               | 56.38 (0.58)        | 6.06 (0.60)  | <b>&lt;0.0001</b> |

Data source: NHANES 2003-2018; subjects 19 years and older with complete, reliable dietary recall on Day 1 (N=35,126). <sup>a</sup>Values are adjusted for age, gender, ethnicity (Mexican American, other Hispanic, White, Black, Other), poverty income ratio, physical activity level (sedentary, moderate, vigorous), smoking status, total vegetables, non-watermelon fruit, and total dairy. <sup>b</sup>p value for difference of intake between watermelon consumers and non-consumers; Bolded values are significantly different, p<0.05; SE = standard error.

Supplementary Table S4. Energy and nutrient intakes in children watermelon consumers (n=513) and non-consumers (n=18,821), NHANES 2003-2018, gender combined data

| Nutrients <sup>a</sup>   | Non-Consumer<br>(n=18,821) | Consumer<br>(n=513) | Beta (SE)     | P <sup>b</sup>    |
|--------------------------|----------------------------|---------------------|---------------|-------------------|
|                          | Mean (SE)                  | Mean (SE)           |               |                   |
| Added sugars (tsp eq)    | 18.90 (0.14)               | 16.27 (0.63)        | -2.63 (0.63)  | <b>0.0001</b>     |
| Beta-carotene (mcg)      | 1,155 (26.5)               | 2,160 (167.8)       | 1,005 (169.0) | <b>&lt;0.0001</b> |
| Beta-cryptoxanthin (mcg) | 78.86 (2.56)               | 264.0 (17.3)        | 185.1 (17.2)  | <b>&lt;0.0001</b> |
| Calcium (mg)             | 1,013 (3.09)               | 1,059 (18.4)        | 45.60 (18.3)  | <b>0.0141</b>     |
| Carbohydrate (gm)        | 257.5 (0.58)               | 260.6 (2.34)        | 3.04 (2.34)   | 0.1962            |
| Cholesterol (mg)         | 218.5 (1.81)               | 230.2 (12.7)        | 11.71 (12.7)  | 0.3582            |
| Choline (mg)             | 248.6 (1.45)               | 271.4 (10.3)        | 22.78 (10.3)  | <b>0.0290</b>     |
| Copper (mg)              | 0.98 (0.01)                | 1.08 (0.02)         | 0.10 (0.02)   | <b>&lt;0.0001</b> |
| Dietary fiber (gm)       | 13.56 (0.08)               | 15.19 (0.42)        | 1.63 (0.41)   | <b>0.0001</b>     |
| Energy (kcal)            | 1,939 (8.49)               | 1,971 (35.2)        | 31.96 (35.7)  | 0.3722            |
| Folate, DFE (µg)         | 517.4 (4.62)               | 531.9 (19.9)        | 14.50 (19.4)  | 0.4572            |
| Iron (mg)                | 14.10 (0.10)               | 14.51 (0.35)        | 0.41 (0.36)   | 0.2515            |

|                           |              |              |               |                   |
|---------------------------|--------------|--------------|---------------|-------------------|
| Lutein + zeaxanthin (mcg) | 782.2 (17.5) | 1,009 (92.9) | 226.5 (95.6)  | <b>0.0194</b>     |
| Lycopene (mcg)            | 4,307 (87.6) | 14,590 (848) | 10,283 (867)  | <b>&lt;0.0001</b> |
| Magnesium (mg)            | 231.7 (0.96) | 263.3 (4.99) | 31.65 (4.99)  | <b>&lt;0.0001</b> |
| Niacin (mg)               | 21.24 (0.13) | 21.61 (0.50) | 0.37 (0.51)   | 0.4631            |
| Phosphorus (mg)           | 1,257 (3.72) | 1,303 (20.1) | 46.66 (19.9)  | <b>0.0203</b>     |
| Potassium (mg)            | 2,175 (7.24) | 2,384 (39.1) | 209.5 (39.0)  | <b>&lt;0.0001</b> |
| Protein (gm)              | 68.42 (0.26) | 71.41 (1.44) | 2.99 (1.43)   | <b>0.0390</b>     |
| Riboflavin (Vitamin B2)   |              |              |               |                   |
| (mg)                      | 2.00 (0.01)  | 2.02 (0.03)  | 0.02 (0.03)   | 0.5201            |
| Sodium (mg)               | 3,073 (13.5) | 3,045 (51.8) | -28.84 (53.5) | 0.5905            |
| Thiamin (Vitamin B1)      |              |              |               |                   |
| (mg)                      | 1.55 (0.01)  | 1.60 (0.04)  | 0.05 (0.04)   | 0.1758            |
| Total Folate (mcg)        | 368.0 (2.87) | 385.9 (12.1) | 17.89 (12.0)  | 0.1370            |
| Total fat (gm)            | 73.00 (0.22) | 71.62 (0.78) | -1.38 (0.78)  | 0.0814            |
| Total MUFA (gm)           | 25.58 (0.10) | 24.68 (0.35) | -0.90 (0.35)  | <b>0.0123</b>     |
| Total PUFA (gm)           | 15.41 (0.08) | 15.76 (0.46) | 0.35 (0.46)   | 0.4470            |
| Total SFA (gm)            | 25.56 (0.10) | 24.63 (0.49) | -0.93 (0.49)  | 0.0604            |
| Total sugars (gm)         | 124.8 (0.63) | 126.6 (2.80) | 1.89 (2.77)   | 0.4958            |
| Vitamin A (RE)            | 585.4 (4.77) | 687.1 (23.3) | 101.7 (23.3)  | <b>&lt;0.0001</b> |
| Vitamin B12 (mcg)         | 4.84 (0.04)  | 5.08 (0.24)  | 0.24 (0.24)   | 0.3264            |
| Vitamin B6 (mg)           | 1.71 (0.01)  | 1.81 (0.05)  | 0.10 (0.05)   | 0.0611            |
| Vitamin C (mg)            | 78.03 (0.79) | 96.93 (4.10) | 18.90 (4.15)  | <b>&lt;0.0001</b> |
| Vitamin D (D2+D3) (µg)    | 5.55 (0.04)  | 5.79 (0.27)  | 0.24 (0.27)   | 0.3735            |
| Vitamin E (ATE) (mg)      | 6.65 (0.08)  | 7.27 (0.48)  | 0.62 (0.47)   | 0.1882            |
| Vitamin K                 | 61.89 (0.97) | 70.45 (3.61) | 8.56 (3.62)   | <b>0.0197</b>     |
| Zinc (mg)                 | 10.25 (0.07) | 10.44 (0.27) | 0.19 (0.28)   | 0.4920            |

Data source: NHANES 2003-2018; subjects 2 to 18 years old with complete, reliable dietary recall on Day 1 (N=21,004). <sup>a</sup>Values are adjusted for age, gender, ethnicity (Mexican American, other Hispanic, White, Black, Other), poverty income ratio, physical activity level (sedentary, moderate, vigorous), energy intake (except for energy), total vegetables, non-watermelon fruit, and total dairy. <sup>b</sup>p value for difference of intake between watermelon consumers and non-consumers; Bolded values are significantly different, p<0.05; SE = standard error, MUFA = monounsaturated fatty acids, PUFA = polyunsaturated fatty acids, SFA = saturated fatty acids.

Supplementary Table S5. Energy and nutrient intakes in adult watermelon consumers (n=792) and non-consumers (n=31,569), NHANES 2003-2018, gender combined data

| Nutrients <sup>a</sup>   | Non-Consumer<br>(n=31,569) | Consumer<br>(n=792) | Beta (SE)    | P <sup>b</sup>    |
|--------------------------|----------------------------|---------------------|--------------|-------------------|
|                          | Mean (SE)                  | Mean (SE)           |              |                   |
| Added sugars (tsp eq)    | 18.22 (0.13)               | 16.92 (0.62)        | -1.30 (0.64) | <b>0.0435</b>     |
| Beta-carotene (mcg)      | 2,147 (34.6)               | 3,236 (227)         | 1,089 (231)  | <b>&lt;0.0001</b> |
| Beta-cryptoxanthin (mcg) | 89.15 (1.73)               | 337.6 (23.0)        | 248.5 (23.3) | <b>&lt;0.0001</b> |
| Calcium (mg)             | 959.6 (2.41)               | 965.7 (11.4)        | 6.02 (11.4)  | 0.5999            |
| Carbohydrate (gm)        | 257.3 (0.57)               | 269.2 (2.28)        | 11.88 (2.40) | <b>&lt;0.0001</b> |
| Cholesterol (mg)         | 292.6 (1.89)               | 289.7 (9.25)        | -2.84 (9.32) | 0.7607            |
| Choline (mg)             | 335.8 (1.38)               | 342.1 (6.55)        | 6.27 (6.71)  | 0.3519            |

|                           |              |              |               |                   |
|---------------------------|--------------|--------------|---------------|-------------------|
| Copper (mg)               | 1.30 (0.01)  | 1.31 (0.02)  | 0.01 (0.03)   | 0.6286            |
| Dietary fiber (gm)        | 16.73 (0.08) | 16.92 (0.31) | 0.19 (0.32)   | 0.5512            |
| Energy (kcal)             | 2,161 (6.34) | 2,157 (29.3) | -3.67 (30.3)  | 0.9036            |
| Folate, DFE (µg)          | 534.6 (2.81) | 554.4 (18.8) | 19.79 (18.9)  | 0.2961            |
| Iron (mg)                 | 15.11 (0.05) | 15.33 (0.33) | 0.22 (0.34)   | 0.5163            |
| Lutein + zeaxanthin (mcg) | 1,574 (33.1) | 1,617 (158)  | 42.73 (158)   | 0.7877            |
| Lycopene (mcg)            | 5,197 (84.1) | 18,024 (971) | 12,827 (960)  | <b>&lt;0.0001</b> |
| Magnesium (mg)            | 302.1 (1.10) | 315.3 (4.77) | 13.16 (4.95)  | <b>0.0089</b>     |
| Niacin (mg)               | 25.88 (0.11) | 25.64 (0.45) | -0.24 (0.45)  | 0.6031            |
| Phosphorus (mg)           | 1,384 (3.16) | 1,371 (13.0) | -13.65 (13.5) | 0.3138            |
| Potassium (mg)            | 2,694 (5.69) | 2,878 (35.1) | 184.0 (35.8)  | <b>&lt;0.0001</b> |
| Protein (gm)              | 83.17 (0.25) | 82.80 (1.01) | -0.38 (1.02)  | 0.7129            |
| Riboflavin (Vitamin B2)   |              |              |               |                   |
| (mg)                      | 2.20 (0.01)  | 2.18 (0.05)  | -0.02 (0.05)  | 0.6549            |
| Sodium (mg)               | 3,600 (8.82) | 3,509 (63.2) | -90.85 (64.8) | 0.1632            |
| Thiamin (Vitamin B1)      |              |              |               |                   |
| (mg)                      | 1.64 (0.01)  | 1.75 (0.04)  | 0.12 (0.04)   | <b>0.0070</b>     |
| Total Folate (mcg)        | 405.2 (1.92) | 419.1 (11.8) | 13.89 (11.9)  | 0.2464            |
| Total fat (gm)            | 83.49 (0.19) | 79.24 (0.91) | -4.24 (0.94)  | <b>&lt;0.0001</b> |
| Total MUFA (gm)           | 29.91 (0.08) | 28.24 (0.42) | -1.66 (0.43)  | <b>0.0002</b>     |
| Total PUFA (gm)           | 18.82 (0.09) | 17.79 (0.34) | -1.03 (0.35)  | <b>0.0040</b>     |
| Total SFA (gm)            | 27.31 (0.08) | 26.04 (0.43) | -1.27 (0.44)  | <b>0.0046</b>     |
| Total sugars (gm)         | 115.0 (0.54) | 126.1 (2.83) | 11.11 (2.91)  | <b>0.0002</b>     |
| Vitamin A (RE)            | 631.6 (5.94) | 696.6 (27.2) | 65.08 (28.1)  | <b>0.0220</b>     |
| Vitamin B12 (mcg)         | 5.21 (0.05)  | 4.81 (0.16)  | -0.40 (0.16)  | <b>0.0144</b>     |
| Vitamin B6 (mg)           | 2.09 (0.01)  | 2.11 (0.06)  | 0.01 (0.05)   | 0.8311            |
| Vitamin C (mg)            | 81.83 (0.62) | 111.1 (3.83) | 29.27 (3.96)  | <b>&lt;0.0001</b> |
| Vitamin D (D2+D3) (µg)    | 4.62 (0.05)  | 4.47 (0.25)  | -0.15 (0.25)  | 0.5394            |
| Vitamin E (ATE) (mg)      | 8.47 (0.06)  | 7.97 (0.22)  | -0.50 (0.23)  | <b>0.0309</b>     |
| Vitamin K                 | 112.7 (1.64) | 110.5 (9.23) | -2.17 (9.23)  | 0.8141            |
| Zinc (mg)                 | 11.75 (0.06) | 11.60 (0.26) | -0.15 (0.26)  | 0.5613            |

Data source: NHANES 2003-2018; subjects 19 years and older with complete, reliable dietary recall on Day 1 (N=35,126). <sup>a</sup>Values are adjusted for age, gender, ethnicity (Mexican American, other Hispanic, White, Black, Other), poverty income ratio, physical activity level (sedentary, moderate, vigorous), smoking status, energy intake (except for energy), total vegetables, non-watermelon fruit, and total dairy. <sup>b</sup>p value for difference of intake between watermelon consumers and non-consumers; Bolded values are significantly different, p<0.05; SE = standard error, MUFA = monounsaturated fatty acids, PUFA = polyunsaturated fatty acids, SFA = saturated fatty acids.
